# Supplementary material for: Impaired Audiovisual Representation of Phonemes in Children with Developmental Language Disorder
Source: MDPI journal article supplement (doi:10.3390/brainsci11040507), 2021-04-16
Supplement: s1 [file s1]

## Supplementary Materials

Table S1. Numbers of useable trials in each group for each condition and each stimulus type.

| Neutral Condition               |      |         |     |          |       |     |
|---------------------------------|------|---------|-----|----------|-------|-----|
| Standards                       |      |         |     | Deviants |       |     |
| Group                           | Mean | Range   | SE  | Mean     | Range | SE  |
| DLD                             | 195  | 126-221 | 5.7 | 81       | 40-94 | 3.1 |
| TD                              | 206  | 147-233 | 5.1 | 86       | 66-94 | 1.8 |
| Audiovisual Violation Condition |      |         |     |          |       |     |
| Standards                       |      |         |     | Deviants |       |     |
| Group                           | Mean | Range   | SE  | Mean     | Range | SE  |
| DLD                             | 199  | 110-228 | 6.3 | 82       | 49-95 | 2.6 |
| TD                              | 209  | 152-233 | 4.7 | 87       | 62-94 | 1.8 |

Table S2. Models of Accuracy (72 repeated observations / 36 subjects)

|                                     | Main Effects Model |         |        |       |                  | Interaction Model |         |        |       |                  |
|-------------------------------------|--------------------|---------|--------|-------|------------------|-------------------|---------|--------|-------|------------------|
|                                     | b                  | p-value | 95% CI |       | b <sub>std</sub> | b                 | p-value | 95% CI |       | b <sub>std</sub> |
| <i>fixed effects</i>                |                    |         |        |       |                  |                   |         |        |       |                  |
|                                     |                    |         |        |       |                  |                   |         |        |       |                  |
| Group (DLD v. TD)                   | -2.34              | 0.06    | -4.75  | 0.07  | -0.60            | -2.49             | 0.050   | -4.98  | 0.00  | -0.64            |
| Condition (AV violation v. neutral) | -0.38              | 0.23    | -0.99  | 0.24  | -0.10            | -0.52             | 0.246   | -1.40  | 0.36  | -0.13            |
| GroupXCondition                     |                    |         |        |       |                  | 0.29              | 0.648   | -0.95  | 1.53  | 0.07             |
| <i>random effects</i>               |                    |         |        |       |                  |                   |         |        |       |                  |
| intercept                           | 12.71              |         | 7.64   | 21.16 |                  | 12.69             |         | 7.62   | 21.15 |                  |
| residual                            | 1.77               |         | 1.11   | 2.83  |                  | 1.81              |         | 1.13   | 2.92  |                  |

b<sub>std</sub> is a partially standardized coefficient where the outcome is standardized, comparable to a conditional Cohen's d

Table S3. Models of Response Time (72 repeated observations / 36 subjects)

|                                     | Main Effects Model |                 |         |          |                  | Interaction Model |                 |         |          |                  |
|-------------------------------------|--------------------|-----------------|---------|----------|------------------|-------------------|-----------------|---------|----------|------------------|
|                                     | b                  | <i>p</i> -value | 95% CI  |          | b <sub>std</sub> | b                 | <i>p</i> -value | 95% CI  |          | b <sub>std</sub> |
| <i>fixed effects</i>                |                    |                 |         |          |                  |                   |                 |         |          |                  |
| Group (DLD v. TD)                   | -24.74             | 0.429           | -86.10  | 36.62    | -0.26            | -32.00            | 0.310           | -93.84  | 29.84    | -0.34            |
| Condition (AV violation v. neutral) | 11.95              | 0.003           | 4.01    | 19.89    | 0.13             | 4.69              | 0.397           | -6.16   | 15.54    | 0.05             |
| GroupXCondition                     |                    |                 |         |          |                  | 14.52             | 0.064           | -0.83   | 29.87    | 0.15             |
| <i>random effects</i>               |                    |                 |         |          |                  |                   |                 |         |          |                  |
| intercept                           | 8672.79            |                 | 5347.73 | 14065.25 |                  | 8682.39           |                 | 5356.56 | 14073.21 |                  |
| residual                            | 295.21             |                 | 184.78  | 471.64   |                  | 275.99            |                 | 171.57  | 443.96   |                  |

b<sub>std</sub> is a partially standardized coefficient where the outcome is standardized, comparable to a conditional Cohen's d

Table S4. Models of Posterior MMN (720 repeated observations / 36 subjects)

|                                     | Main Effects Model |         |        |       |                  | Best Model |         |        |       |                  |
|-------------------------------------|--------------------|---------|--------|-------|------------------|------------|---------|--------|-------|------------------|
|                                     | b                  | p-value | 95% CI |       | b <sub>std</sub> | b          | p-value | 95% CI |       | b <sub>std</sub> |
| <i>fixed effects*</i>               |                    |         |        |       |                  |            |         |        |       |                  |
| Group (DLD v. TD)                   | 0.79               | 0.239   | -0.52  | 2.10  | 0.26             | 0.04       | 0.955   | -1.31  | 1.38  | 0.01             |
| Condition (AV violation v. neutral) | -1.05              | 0.000   | -1.36  | -0.74 | -0.35            | -1.80      | 0.000   | -2.23  | -1.37 | -0.61            |
| Hemisphere (right v. midline)       | -0.24              | 0.277   | -0.66  | 0.19  | -0.08            | -0.24      | 0.269   | -0.65  | 0.18  | -0.08            |
| Hemisphere (left v. midline)        | 0.22               | 0.312   | -0.21  | 0.64  | 0.07             | 0.22       | 0.304   | -0.20  | 0.64  | 0.07             |
| Hemisphere (right v. left)          | -0.45              | 0.010   | -0.80  | -0.11 | -0.15            | -0.45      | 0.009   | -0.80  | -0.11 | -0.15            |
| GroupXCondition                     |                    |         |        |       |                  | 1.49       | 0.000   | 0.88   | 2.10  | 0.50             |
| <i>random effects</i>               |                    |         |        |       |                  |            |         |        |       |                  |
| intercept                           | 3.79               |         | 2.29   | 6.27  |                  | 3.80       |         | 2.30   | 6.28  |                  |
| residual                            | 4.50               |         | 4.04   | 5.01  |                  | 4.36       |         | 3.91   | 4.85  |                  |

b<sub>std</sub> is a partially standardized coefficient where the outcome is standardized, comparable to a conditional Cohen's d

\*models control for electrode site

Table S5. Models of Anterior MMN (720 repeated observations / 36 subjects)

|                                     | Main Effects Model |                 |        |       |                  | Best Model |                 |        |       |                  |
|-------------------------------------|--------------------|-----------------|--------|-------|------------------|------------|-----------------|--------|-------|------------------|
|                                     | b                  | <i>p</i> -value | 95% CI |       | b <sub>std</sub> | b          | <i>p</i> -value | 95% CI |       | b <sub>std</sub> |
| <i>fixed effects*</i>               |                    |                 |        |       |                  |            |                 |        |       |                  |
| Group (DLD v. TD)                   | 0.46               | 0.274           | -0.36  | 1.28  | 0.20             | 0.00       | 0.995           | -0.86  | 0.87  | 0.00             |
| Condition (AV violation v. neutral) | -0.37              | 0.008           | -0.64  | -0.10 | -0.16            | -0.82      | 0.000           | -1.20  | -0.44 | -0.37            |
| Hemisphere (right v. midline)       | -0.83              | 0.000           | -1.20  | -0.45 | -0.37            | -0.83      | 0.000           | -1.19  | -0.46 | -0.37            |
| Hemisphere (left v. midline)        | -0.46              | 0.014           | -0.84  | -0.09 | -0.21            | -0.46      | 0.013           | -0.83  | -0.10 | -0.21            |
| Hemisphere (right v. left)          | -0.36              | 0.019           | -0.66  | -0.06 | -0.16            | -0.36      | 0.019           | -0.66  | -0.06 | -0.16            |
| GroupXCondition                     |                    |                 |        |       |                  | 0.91       | 0.001           | 0.38   | 1.45  | 0.41             |
| <i>random effects</i>               |                    |                 |        |       |                  |            |                 |        |       |                  |
| intercept                           | 1.42               |                 | 0.83   | 2.42  |                  | 1.42       |                 | 0.84   | 2.42  |                  |
| residual                            | 3.44               |                 | 3.09   | 3.83  |                  | 3.39       |                 | 3.04   | 3.77  |                  |

b<sub>std</sub> is a partially standardized coefficient where the outcome is standardized, comparable to a conditional Cohen's d

\*models control for electrode site

Table S6. Models of P3 (576 repeated observations / 36 subjects)

|                                     | Main Effects & Best Model |         |        |       |                  |
|-------------------------------------|---------------------------|---------|--------|-------|------------------|
|                                     | b                         | p-value | 95% CI |       | b <sub>std</sub> |
| <i>fixed effects*</i>               |                           |         |        |       |                  |
| Group (DLD v. TD)                   | -0.30                     | 0.681   | -1.76  | 1.15  | -0.10            |
| Condition (AV violation v. neutral) | -0.20                     | 0.267   | -0.54  | 0.15  | -0.06            |
| Hemisphere (right v. midline)       | -1.15                     | 0.000   | -1.61  | -0.69 | -0.38            |
| Hemisphere (left v. midline)        | -0.31                     | 0.189   | -0.76  | 0.15  | -0.10            |
| Hemisphere (right v. left)          | -0.84                     | 0.000   | -1.27  | -0.42 | -0.28            |
| <i>random effects</i>               |                           |         |        |       |                  |
| intercept                           | 4.66                      |         | 2.81   | 7.71  |                  |
| residual                            | 4.49                      |         | 3.98   | 5.07  |                  |

b<sub>std</sub> is a partially standardized coefficient where the outcome is standardized, comparable to a conditional Cohen's d

\*models control for electrode site
